# Supplementary material
Source: PubMed Central journal article supplement (PMC9630264)
Supplement: 43856_2022_202_MOESM2_ESM.pdf [file 43856_2022_202_MOESM2_ESM.pdf]

**Clinical and Cognitive Improvement Following Full-Spectrum, High-Cannabidiol  
Treatment for Anxiety: An Open-Label, Phase 2 Trial**

**Supplemental Materials:**

**Supplemental Table 1.** Changes in Mood, Sleep Disturbance, Sexual Dysfunction, and Quality of Life Over the Course of 4 Weeks of Treatment with a High-Cannabidiol (CBD) Sublingual Study Product: Autoregressive Linear Mixed Models (Two-Tailed)

**Supplemental Table 2.** Pearson Correlations Assessing the Association Between Positive and Negative Expectancies and the Difference Score (Baseline minus Week 4) of Clinical Outcome Variables

**Supplemental Table 1.** Changes in Mood, Sleep Disturbance, Sexual Dysfunction, and Quality of Life Over the Course of 4 Weeks of Treatment with a High-Cannabidiol (CBD) Sublingual Study Product: Autoregressive Linear Mixed Models (Two-Tailed)

| Clinical Scale                                       | Mixed Model                         | Baseline<br><i>n</i> =14 (ref.) | Week 1<br><i>n</i> =14                       | Week 2<br><i>n</i> =14                       | Week 3<br><i>n</i> =14                       | Week 4<br><i>n</i> =14                       | Baseline<br>to Week 4 |
|------------------------------------------------------|-------------------------------------|---------------------------------|----------------------------------------------|----------------------------------------------|----------------------------------------------|----------------------------------------------|-----------------------|
|                                                      | <i>F</i><br><i>p</i> ( $\eta_p^2$ ) | Mean<br>[95% CI]                | Estimate ( <i>p</i> )<br>[95% CI]            | Estimate ( <i>p</i> )<br>[95% CI]            | Estimate ( <i>p</i> )<br>[95% CI]            | Estimate ( <i>p</i> )<br>[95% CI]            | Percent<br>Change     |
| <b>Depression Scales</b>                             |                                     |                                 |                                              |                                              |                                              |                                              |                       |
| Beck Depression Inventory (BDI)                      | <b>15.72</b><br><.001 (.65)         | 20.07<br>[16.56, 23.58]         | <b>-8.43 (&lt;.001)</b><br>[-11.28, -5.57]   | <b>-11.93 (&lt;.001)</b><br>[-15.59, -8.27]  | <b>-13.57 (&lt;.001)</b><br>[-17.68, -9.46]  | <b>-15.64 (&lt;.001)</b><br>[-20.03, -11.25] | <b>-77.94%</b>        |
| Beck Hopelessness Scale (BHS)                        | <b>16.06</b><br>.001 (.55)          | 8.29<br>[5.83, 10.74]           | -                                            | -                                            | -                                            | <b>-5.36 (.001)</b><br>[-8.25, -2.47]        | <b>-64.66%</b>        |
| Beck Scale for Suicide Ideation (BSS)                | 3.06<br>.104 (.19)                  | 0.64<br>[-0.29, 1.57]           | -                                            | -                                            | -                                            | -0.29 (.104)<br>[-0.64, 0.07]                | -44.44%               |
| <b>Profile of Mood States (POMS)</b>                 |                                     |                                 |                                              |                                              |                                              |                                              |                       |
| Total Mood Disturbance                               | <b>10.95</b><br><.001 (.63)         | 65.86<br>[51.02, 80.69]         | <b>-26.57 (&lt;.001)</b><br>[-36.05, -17.09] | <b>-36.14 (&lt;.001)</b><br>[-48.76, -23.52] | <b>-34.93 (&lt;.001)</b><br>[-49.54, -20.31] | <b>-41.93 (&lt;.001)</b><br>[-57.95, -25.91] | <b>-63.67%</b>        |
| <b>Positive and Negative Affect Schedule (PANAS)</b> |                                     |                                 |                                              |                                              |                                              |                                              |                       |
| Positive Affect                                      | 1.88<br>.129 (.14)                  | 29.36<br>[25.18, 33.53]         | -0.36 (.844)<br>[-3.98, 3.27]                | -2.21 (.338)<br>[-6.80, 2.37]                | -1.29 (.616)<br>[-6.38, 3.81]                | 3.21 (.238)<br>[-2.18, 8.60]                 | 10.95%                |
| Negative Affect                                      | <b>7.49</b><br><.001 (.44)          | 26.21<br>[22.41, 30.02]         | <b>-8.00 (.001)</b><br>[-12.72, -3.28]       | <b>-12.29 (&lt;.001)</b><br>[-17.51, -7.07]  | <b>-11.57 (&lt;.001)</b><br>[-16.91, -6.23]  | <b>-12.71 (&lt;.001)</b><br>[-18.09, -7.34]  | <b>-48.50%</b>        |
| <b>Sleep Disturbance</b>                             |                                     |                                 |                                              |                                              |                                              |                                              |                       |
| Pittsburgh Sleep Quality Index (PSQI)                | <b>20.27</b><br>.001 (.61)          | 9.21<br>[7.57, 10.86]           | -                                            | -                                            | -                                            | <b>-3.36 (.001)</b><br>[-4.97, -1.75]        | <b>-36.43%</b>        |
| <b>Sexual Dysfunction</b>                            |                                     |                                 |                                              |                                              |                                              |                                              |                       |
| Arizona Sexual Experiences Scale (ASEX) <sup>a</sup> | 1.55<br>.237 (.11)                  | 15.08<br>[12.03, 18.12]         | -                                            | -                                            | -                                            | -0.54 (.237)<br>[-1.48, 0.40]                | -3.57%                |
| <b>Medical Outcomes Survey Short Form (SF-36)</b>    |                                     |                                 |                                              |                                              |                                              |                                              |                       |
| Physical Function                                    | 4.10<br>.064 (.24)                  | 78.57<br>[66.17, 90.97]         | -                                            | -                                            | -                                            | 5.36 (.064)<br>[-0.36, 11.07]                | 6.82%                 |
| Role Limitations: Physical Health                    | 2.58<br>.133 (.17)                  | 60.71<br>[39.51, 81.91]         | -                                            | -                                            | -                                            | 16.07 (.133)<br>[-5.57, 37.71]               | 26.47%                |
| Role Limitations: Emotional Problems                 | <b>32.50</b><br><.001 (.71)         | 26.19<br>[7.33, 45.05]          | -                                            | -                                            | -                                            | <b>47.62 (&lt;.001)</b><br>[29.57, 65.67]    | <b>181.82%</b>        |
| Energy/Fatigue                                       | <b>8.50</b><br>.012 (.40)           | 30.36<br>[18.54, 42.18]         | -                                            | -                                            | -                                            | <b>16.79 (.012)</b><br>[4.35, 29.22]         | <b>55.29%</b>         |
| Emotional Well-Being                                 | <b>56.52</b><br><.001 (.81)         | 49.14<br>[42.10, 56.19]         | -                                            | -                                            | -                                            | <b>24.86 (&lt;.001)</b><br>[17.71, 32.00]    | <b>50.58%</b>         |
| Social Function                                      | <b>37.16</b><br><.001 (.74)         | 52.68<br>[41.57, 63.79]         | -                                            | -                                            | -                                            | <b>29.46 (&lt;.001)</b><br>[19.02, 39.91]    | <b>55.93%</b>         |
| Pain                                                 | 4.74<br>.049 (.27)                  | 59.82<br>[45.53, 74.12]         | -                                            | -                                            | -                                            | 10.18 (.049)<br>[0.07, 20.28]                | 17.01%                |
| General Health                                       | 2.98<br>.108 (.19)                  | 55.00<br>[45.93, 64.07]         | -                                            | -                                            | -                                            | 6.43 (.108)<br>[-1.61, 14.47]                | 11.69%                |

**Bold** numbers are significant at  $p \leq .010$  for 5 timepoints and  $p \leq .025$  for 2 timepoints.

Significance is only noted for estimates relative to the baseline reference group.

Note: For the BDI, BHS, BSS, POMS, PANAS negative affect, PSQI, and ASEX scales, reduced estimates indicate clinical improvement. For the PANAS positive affect, and SF-36 scales, increased estimates indicate clinical improvement.

<sup>a</sup>  $n=13$ : one patient was not sexually active and therefore did not complete the ASEX

**Supplemental Table 2.** Pearson Correlations Assessing the Association Between Positive and Negative Expectancies and the Difference Score (Baseline minus Week 4) of Clinical Outcome Variables

| Clinical Outcome Variables                            | Marijuana Effect Expectancy Questionnaire-Brief (MEEQ-B) |                                   |
|-------------------------------------------------------|----------------------------------------------------------|-----------------------------------|
|                                                       | Positive Expectancies                                    | Negative Expectancies             |
| <b>Anxiety Scales</b>                                 |                                                          |                                   |
| Beck Anxiety Inventory (BAI)                          | <i>r</i> =.048<br><i>p</i> =.871                         | <i>r</i> =-.185<br><i>p</i> =.526 |
| Overall Anxiety Severity and Impairment Scale (OASIS) | <i>r</i> =-.377<br><i>p</i> =.184                        | <i>r</i> =-.056<br><i>p</i> =.849 |
| Hamilton Anxiety Rating Scale (HAM-A)                 | <i>r</i> =-.002<br><i>p</i> =.994                        | <i>r</i> =-.086<br><i>p</i> =.770 |
| State-Trait Anxiety Inventory (STAI): State           | <i>r</i> =-.125<br><i>p</i> =.670                        | <i>r</i> =.137<br><i>p</i> =.641  |
| State-Trait Anxiety Inventory (STAI): Trait           | <i>r</i> =-.161<br><i>p</i> =.583                        | <i>r</i> =.100<br><i>p</i> =.735  |
| <b>Depression Scales</b>                              |                                                          |                                   |
| Beck Depression Inventory (BDI)                       | <i>r</i> =-.067<br><i>p</i> =.820                        | <i>r</i> =.043<br><i>p</i> =.883  |
| Beck Hopelessness Scale (BHS)                         | <i>r</i> =-.193<br><i>p</i> =.509                        | <i>r</i> =.265<br><i>p</i> =.360  |
| Beck Scale for Suicide Ideation (BSS)                 | <i>r</i> =.283<br><i>p</i> =.328                         | <i>r</i> =-.274<br><i>p</i> =.343 |
| <b>Profile of Mood States (POMS)</b>                  |                                                          |                                   |
| Total Mood Disturbance                                | <i>r</i> =-.267<br><i>p</i> =.356                        | <i>r</i> =.186<br><i>p</i> =.524  |
| <b>Positive and Negative Affect Schedule (PANAS)</b>  |                                                          |                                   |
| Positive Affect                                       | <i>r</i> =.148<br><i>p</i> =.613                         | <i>r</i> =-.352<br><i>p</i> =.217 |
| Negative Affect                                       | <i>r</i> =-.017<br><i>p</i> =.953                        | <i>r</i> =-.168<br><i>p</i> =.566 |
| <b>Sleep Disturbance</b>                              |                                                          |                                   |
| Pittsburgh Sleep Quality Index (PSQI)                 | <i>r</i> =.136<br><i>p</i> =.644                         | <i>r</i> =.177<br><i>p</i> =.545  |
| <b>Sexual Dysfunction</b>                             |                                                          |                                   |
| Arizona Sexual Experiences Scale (ASEX) <sup>a</sup>  | <i>r</i> =-.432<br><i>p</i> =.140                        | <i>r</i> =-.625<br><i>p</i> =.022 |
| <b>Medical Outcomes Survey Short Form (SF-36)</b>     |                                                          |                                   |
| Physical Function                                     | <i>r</i> =.400<br><i>p</i> =.157                         | <i>r</i> =-.426<br><i>p</i> =.128 |
| Role Limitations: Physical Health                     | <i>r</i> =.563<br><i>p</i> =.036                         | <i>r</i> =-.282<br><i>p</i> =.329 |
| Role Limitations: Emotional Problems                  | <i>r</i> =.371<br><i>p</i> =.191                         | <i>r</i> =-.148<br><i>p</i> =.615 |
| Energy/Fatigue                                        | <i>r</i> =.501<br><i>p</i> =.068                         | <i>r</i> =-.056<br><i>p</i> =.849 |
| Emotional Well-Being                                  | <i>r</i> =.083<br><i>p</i> =.779                         | <i>r</i> =.014<br><i>p</i> =.962  |
| Social Function                                       | <i>r</i> =.227<br><i>p</i> =.436                         | <i>r</i> =.079<br><i>p</i> =.788  |
| Pain                                                  | <i>r</i> =.191<br><i>p</i> =.514                         | <i>r</i> =.224<br><i>p</i> =.442  |
| General Health                                        | <i>r</i> =.429<br><i>p</i> =.126                         | <i>r</i> =-.437<br><i>p</i> =.118 |

Unless otherwise noted, n=14

**Bold** numbers are significant at  $p \leq .010$ <sup>a</sup> n=13: one patient was not sexually active and therefore did not complete the ASEX
